# Supplementary material
Source: publisher figshare collection journal article supplement (https://asha.figshare.com/ndownloader/files/25329650)
Supplement: Supplementary file 1 [file 25329650]

## Sheet: Sheet1
Supplemental material, Guo et al., “Clausal Density Between Ages 4 and 9 Years for the Edmonton Narrative Norms Instrument: Reference Data and Psychometric Properties,” LSHSS, https://doi.org/10.1044/2020_LSHSS-20-00043
Supplemental Material S5. Z-score calculation table for clausal density scores.
(CD = Clausal Density)
Please enter the CD score into the cell (marked in red) based on the child's age
4 Year Olds
		Clausal Density Score
	Mean	1.24
	SD	0.14
	90% CI Upper Limit	1.34
	90% CI Lower Limit	1.02
	95% CI Upper Limit	1.37
	95% CI Lower Limit	0.99
The child's CD score	z-score
1.18	-0.428571
5 Year Olds
		Clausal Density Score
	Mean	1.27
	SD	0.2
	90% CI Upper Limit	1.32
	90% CI Lower Limit	1.04
	95% CI Upper Limit	1.34
	95% CI Lower Limit	1.02
The child's CD score	z-score
1.18	-0.45
6 Year Olds
		Clausal Density Score
	Mean	1.28
	SD	0.1
	90% CI Upper Limit	1.3
	90% CI Lower Limit	1.06
	95% CI Upper Limit	1.32
	95% CI Lower Limit	1.04
The child's CD score	z-score
1.18	-1
7 Year Olds
		Clausal Density Score
	Mean	1.37
	SD	0.15
	90% CI Upper Limit	1.31
	90% CI Lower Limit	1.05
	95% CI Upper Limit	1.34
	95% CI Lower Limit	1.02
The child's CD score	z-score
1.18	-1.26667
8 Year Olds
		Clausal Density Score
	Mean	1.41
	SD	0.12
	90% CI Upper Limit	1.31
	90% CI Lower Limit	1.05
	95% CI Upper Limit	1.34
	95% CI Lower Limit	1.02
The child's CD score	z-score
1.18	-1.91667
9 Year Olds
		Clausal Density Score
	Mean	1.45
	SD	0.13
	90% CI Upper Limit	1.33
	90% CI Lower Limit	1.03
	95% CI Upper Limit	1.36
	95% CI Lower Limit	1
The child's CD score	z-score
1.18	-2.07692
